# Supplementary material for: Li+-intercalated carbon cloth for anode-free Li-ion batteries with unprecedented cyclability
Source: Royal Society of Chemistry journal article supplement (doi:10.1039/d2ta06379d), 2022-01-01
Supplement: d2ta06379d1.pdf [file d2ta06379d1.pdf]

**Li<sup>+</sup>-intercalated carbon cloth for anode-free Li-ion batteries with unprecedented cyclability**

Please find out the following link to get supporting mph files for fig. 4C.

<https://drive.google.com/drive/folders/1WjCrv79RETJPIjPFijQipj5nvPJDeo>
