# Supplementary material for: Li+-intercalated carbon cloth for anode-free Li-ion batteries with unprecedented cyclability
Source: Royal Society of Chemistry journal article supplement (doi:10.1039/d2ta06379d), 2022-01-01
Supplement: d2ta06379d2.pdf [file d2ta06379d2.pdf]

## Supporting Information

### **Li<sup>+</sup>-intercalated carbon cloth for anode-free Li-ion batteries with unprecedented cyclability**

Amol Bhairuba Ikhe<sup>a</sup>, Woon Bae Park<sup>a,\*</sup>, Su Cheol Han<sup>a</sup>, Jung Yong Seo<sup>a</sup>, Suyeon Han<sup>a</sup>, Kee-Sun Sohn<sup>b,\*</sup>, MyoungHo Pyo<sup>a,\*</sup>

<sup>a</sup>*Department of Advanced Components and Materials Engineering, Suncheon national University, Chonnam 57922, Republic of Korea*

<sup>b</sup>*Faculty of Nanotechnology and Advanced Materials Engineering, Sejong University, Seoul 05006, Republic of Korea*

\* Corresponding authors.

E-mail addresses: wbpark@scnu.ac.kr (W. B. Park), kssohn@sejong.ac.kr (K.-S. Sohn), mho@sunchon.ac.kr (M. Pyo)

**Table S1.** Summary on the strategies and performances for AFLIBs (LIBs only).

|                                                                      | Strategies                                                                             | Full cell                                   | Remark                                                                                                 | Ref                              |
|----------------------------------------------------------------------|----------------------------------------------------------------------------------------|---------------------------------------------|--------------------------------------------------------------------------------------------------------|----------------------------------|
| Extra Li                                                             | Replenishable extra Li metal                                                           | Cu/Li    LFP                                | Quite slow discharge to reactivate LFP by using extra Li                                               | S1                               |
|                                                                      | Li-rich $\text{Li}_2[\text{Ni}_{0.8}\text{Co}_{0.1}\text{Mn}_{0.1}]\text{O}_2$ cathode | Cu    $\text{Li}_{1.37}\text{NMC811}$       | Convert to NMC811 after 1 <sup>st</sup> charge                                                         | S2                               |
|                                                                      | $\text{Li}_2\text{O}$ as a sacrificing agent on NMC811                                 | Cu    $\text{Li}_2\text{O}/\text{NMC811}$   | Convert to $\text{Li}_{2-x}\text{O}$ after releasing extra $\text{Li}^+$ during 1 <sup>st</sup> charge | S3                               |
| Surface modified Cu                                                  | CVD-grown graphene                                                                     | Cu/graphene    LFP                          | 61% Q retention after 100 cycles                                                                       | S4                               |
|                                                                      | $\text{Al}_2\text{O}_3$ /polyacrylonitrile composite layer                             | Cu/AOP    NMC111                            | 30% Q retention for 82 cycles                                                                          | S5                               |
|                                                                      | Spin-coated GO                                                                         | Cu/GO    NMC111                             | 44% Q retention for 50 cycles                                                                          | S6                               |
|                                                                      | PEO                                                                                    | Cu/PEO    LFP                               | 30% Q retention after 200 cycles                                                                       | S7                               |
|                                                                      | Ag@PDA/GO                                                                              | Cu/Ag@PDA/GO    NMC111                      | 55.7% Q retention after 60 cycles                                                                      | S8                               |
|                                                                      | Garnet:PVdF:LiClO <sub>4</sub>                                                         | Cu/Garnet/PVdF/LiClO <sub>4</sub>    NMC111 | 59% Q retention after 30 cycles                                                                        | S9                               |
|                                                                      | Spin coated LLZTO/PEO-CPE                                                              | Cu    LLZTO/PEO-CPE    NMC                  | 41.2% Q retention after 65 cycles at 55 °C                                                             | S10                              |
|                                                                      | Sn primer layer                                                                        | Cu/Sn    NCA                                | Convert to Sn-Li alloy during initial plating, then Li P/S cycles on Sn-Li                             | S11                              |
|                                                                      | Benzotriazole coated Cu                                                                | BTA-Cu    LFP                               | 73% Q retention after 50 cycles                                                                        | S12                              |
|                                                                      | $\beta$ -PVDF on Cu with thermal-electrochemical activation                            | Cu/ $\beta$ -PVDF    NMC111                 | 61.4% Q retention after 30 cycles                                                                      | S13                              |
|                                                                      | Ag@P-APF                                                                               | Cu/Ag@P-APF    NMC                          | 40% Q retention after 70 cycles                                                                        | S14                              |
|                                                                      | LiF@PVDF dielectric layer                                                              | Cu/LiF@PVDF    LFP                          | <60% Q retention after 40 cycles                                                                       | S15                              |
|                                                                      | Laser-induced SiOx layer                                                               | Cu/Li-SiOx    LFP                           | 45.6% Q retention after 100 cycles                                                                     | S16                              |
|                                                                      | Dielectric blocks of BaTiO <sub>3</sub> on Cu                                          | Cu/BTO    NMC                               | ~83% Q retention after 50 cycles                                                                       | S17                              |
|                                                                      | Ultrathin Zn-NC-CNT interfacial layer on Cu                                            | Cu/Zn-NC-CNT    NMC811                      | ~85% Q retention after 50 cycles                                                                       | S18                              |
|                                                                      | Electrolyte                                                                            | 4M LiFSI in DME                             | Cu    LFP                                                                                              | 54% Q retention after 100 cycles |
| 1M LiPF <sub>6</sub> in FEC/TTE/EMC                                  |                                                                                        | Cu    NMC111                                | 40% Q retention for 80 cycles                                                                          | S20                              |
| Mixed salt (2M LiFSI + 1M LiTFSI) in DME/DOL                         |                                                                                        | Cu    LFP                                   | 50% Q retention after 50 cycles                                                                        | S21                              |
| 2M LiPF <sub>6</sub> in EC/DEC/FEC                                   |                                                                                        | Cu    NMC111                                | 40% Q retention for 50 cycles                                                                          | S22                              |
| 3M LiFSI in DOL/DME, plating & then 24h resting                      |                                                                                        | Cu    LFP                                   | 64% Q retention after 50 cycles                                                                        | S23                              |
| 2 wt% KPF <sub>6</sub> & 2 vol% TMSP in 1M LiPF <sub>6</sub> /EC:DEC |                                                                                        | Cu    NMC111                                | 48% Q retention after 20 cycles                                                                        | S24                              |
| KNO <sub>3</sub> additive in 1M LiPF <sub>6</sub> /EC:DMC            |                                                                                        | Cu    NMC111                                | 40% Q retention after 50 cycles                                                                        | S25                              |
| 1M LiDFOB+0.05M LiPF <sub>6</sub> in FEC:TTE:DEC                     |                                                                                        | Cu    NMC532                                | 45% Q retention after 35 cycles                                                                        | S26                              |
| 1M LiPF <sub>6</sub> in FEC:TTE (3:7)                                |                                                                                        | Cu    NMC111                                | 50% Q retention after 65 cycles                                                                        | S27                              |
| 2M LiFSI+2MLiNO <sub>3</sub> in DME                                  |                                                                                        | Cu    NMC<br>Cu    LFP                      | 47.3% Q retention after 100 cycles<br>52.7% Q retention after 100                                      | S28                              |

|                  |                                                                                                                                        |                              | cycles                                                                 |     |
|------------------|----------------------------------------------------------------------------------------------------------------------------------------|------------------------------|------------------------------------------------------------------------|-----|
|                  | 1M LiTFSI in TMS+FEC(8:2)                                                                                                              | Cu    NMC811                 | <30% Q retention after 25 cycles                                       | S29 |
|                  | 0.2M LiPF <sub>6</sub> +3.8M LiTFSI +0.2wt% LiNO <sub>3</sub> in EC/DEC/EMC/TEP (1.5:2.5:1:5)                                          | Cu    LFP                    | 54.8% Q retention after 50 cycles                                      | S30 |
|                  | 4.6M LiFSI+2.3M LiTFSI in DME                                                                                                          | Cu    NMC622                 | ~55% Q retention after 25 cycles                                       | S31 |
|                  | VEC additive in 1M LiPF <sub>6</sub> in EC/DMC                                                                                         | Cu    NMC811                 | <15% Q retention after 50 cycles                                       | S32 |
|                  | 1.5M LiPF <sub>6</sub> +1wt% TMSB in FEC/EMC/DMC (34.6:57.2:8.2)                                                                       | Cu    NMC811                 | <20% Q retention after 30 cycles                                       | S33 |
|                  | 1M LiPF <sub>6</sub> in EA/FEC/TTE/EMC (2:1:5:2)                                                                                       | Cu    NMC111                 | <25% Q retention after 60 cycles                                       | S34 |
|                  | 1M LiFSI in Fluorinated 1,4-dimethoxybutane                                                                                            | Cu    NMC                    | 80% Q retention after 100 cycles                                       | S35 |
|                  | Triethylmethylphosphonium bis(fluorosulfonyl)imide [P <sub>1222</sub> ] [FSI] (Boron Molecular) ionic liquid and LiFSI (1:1 mol ratio) | Cu    LFP<br>Cu    sc-NMC622 | 47.3% Q retention after 100 cycles<br>53% Q retention after 100 cycles | S36 |
| P & Temp control | 1M LiPF <sub>6</sub> in FEC:TFEC under 1200 kPa                                                                                        | Cu    NMC111                 |                                                                        | S37 |
|                  | 0.6M LiDFOB:0.6M LiBF <sub>4</sub> /FEC:DEC under pressure                                                                             | Cu    NMC111                 | 80% Q retention after 90 cycles                                        | S38 |
|                  | Hot-formation with pressure                                                                                                            | Cu    NMC532                 | 80% Q retention after 195 cycles                                       | S39 |
| Other substrates | Defective carbon layer coated carbon paper                                                                                             | d-CP    NMC811               | 56% Q retention after 100 cycles                                       | S40 |
|                  | Mesoporous silica thin film on the stainless steel foil                                                                                | SS/MSTF    LFP               | ~45% Q retention after 100 cycles                                      | S41 |

## References

- S1 H. Liu, J. Holoubek, H. Zhou, Z. Wu, X. Xing, S. Yu, G. M. Veith, Y. Li, Y. Choi and P. Liu, *Energy Storage Mater.* 2021, **36**, 251-256.
- S2 L. Lin, K. Qin, Q. Zhang, L. Gu, L. Suo, Y.-S. Hu, H. Li, X. Huang and L. Chen, *Angew. Chem. Int. Ed.* 2021, **60**, 8289-8296.
- S3 Y. Qiao, H. Yang, Z. Chang, H. Deng, X. Li and H. Zhou, *Nat. Energy* 2021, **6**, 653-662.
- S4 A. A. Assegie, C.-C. Chung, M.-C. Tsai, W.-N. Su, C.-W. Chen and B.-J. Hwang, *Nanoscale* 2019, **11**, 2710-2720.
- S5 A. A. Sahalie, Z. T. Wondimkun, W.-N. Su, M. A. Weret, F. W. Fenta, G. B. Berhe, C.-J. Huang, Y.-C. Hsu and B. J. Hwang, *ACS Appl. Energy Mater.* 2020, **3**, 7666-7679.
- S6 Z. T. Wondimkun, T. T. Beyene, M. A. Weret, N. A. Shahilie, C.-J. Huang, B. Thirmalaraj, B. A. Jote, D. Wang, W.-N. Su, C.-H. Wang, G. Bruncklaus, M. Winter and B.-J. Hwang, *J. Power Sources* 2020, **450**, 227589.

- S7 A. A. Assegie, J.-H. Cheng, L.-M. Kuo, W.-N. Su and B.-J. Hwang, *Nanoscale* 2018, **10**, 6125-6138.
- S8 Z. T. Wondimkun, W. A. Tegegne, J. S.-Kai, C.-J. Huang, N. A. Sahilie, M. A. Weret, J.-Y. Hsu, P.-L. Hsieh, Y.-S. Huang, S.-H. Wu, W.-N. Su and B. J. Hwang, *Energy Storage Mater.* 2021, **35**, 334-344.
- S9 L. H. Abrha, T. A. Zegeye, T. T. Hagos, H. Sutiono, T. M. Hagos, G. B. Berhe, C.-J. Huang, S.-K. Jiang, W.-N. Su, Y.-W. Yang and B.-J. Hwang, *Electrochim. Acta* 2019, **325**, 134825.
- S10 T. A. Zegeye, W.-N. Su, F. W. Fenta, T. S. Zeleke, S.-K. Jiang and B. J. Hwang, *Energy Mater.* 2020, **3**, 11713-11723.
- S11 S. S. Zhang, X. Fan and C. Wang, *Electrochim. Acta* 2017, **258**, 1201-1207.
- S12 T. Kang, J. Zhao, F. Guo, L. Zheng, Y. Mao, C. Wang, Y. Zhao, J. Zhu, Y. Qiu, Y. Shen and L. Chen, *ACS Appl. Mater. Interfaces* 2020, **12**, 8168-8175.
- S13 L. H. Abrha, Y. Nikodimos, H. H. Weldeyohannes, T. T. Hagos, D.-Y. Wang, C.-J. Huang, S.-K. Jiang, S.-H. Wu, W.-N. Su, M.-C. Tsai and B. J. Hwang, *ACS Appl. Mater. Interfaces* 2021, **4**, 3240-3248.
- S14 N. T. Temesgen, W. A. Tegegne, K. N. Shitaw, F. W. Fenta, Y. Nikodimos, B. W. Taklu, S.-K. Jiang, C.-J. Huang, S.-H. Wu, W.-N. Su and B.-J. Hwang, *J. Taiwan Inst. Chem. Eng.* 2021, **128**, 87-97.
- S15 O. Tamwattana, H. Park, J. Kim, I. Hwang, G. Yoon, T.-H. Hwang, Y.-S. Kang, J. Park, N. Meethong and K. Kang, *ACS Energy Lett.* 2021, **6**, 4416-4425.
- S16 W. Chen, R. V. Salvatierra, M. Ren, J. Chen, M. G. Stanford and J. M. Tour, *Adv. Mater.* 2020, **31**, 2002850.
- S17 C. Wang, M. Liu, M. Thijs, F. G. B. Ooms, S. Ganapathy and M. Wagemaker, *Nat. Commun.* 2021, **12**, 6536.
- S18 T. Zhao, S. Li, Y. Wang, H. Wang, M. Zhang, X. Tang, F. Liu, D. Du, H. Zheng and Y. Ma, *J. Mater. Chem. A* 2021, **9**, 21281-21290.
- S19 J. Qian, B. D. Adams, J. Zheng, W. Xu, W. A. Henderson, J. Wang, M. E. Bowden, S. Xu, J. Hu and J.-G. Zhang, *Adv. Funct. Mater.* 2016, **26**, 7094-7102.
- S20 T. M. Hagos, T. T. Hagos, H. K. Bazabh, G. B. Berhe, L. H. Abrha, S.-F. Chiu, C.-J. Huang, W.-N. Su and H. Dai, *ACS Appl. Energy Mater.* 2020, **3**, 10722-10733.
- S21 T. T. Beyene, H. K. Bezabh, M. A. Weret, T. M. Hagos, C.-J. Huang, C.-H. Wang, W.-N. Su, H. Dai and B.-J. Hwang, *J. Electrochem. Soc.* 2019, **166**, A1501-A1509.

- S22 T. M. Hagos, B. Thirumalraj, C.-J. Huang, L. H. Abrha, T. M. Hagos, G. B. Berhe, H. K. Bezabh, J. Cherng, S.-F. Chiu, W.-N. Su and B.-J. Hwang, *ACS Appl. Energy Mater.* 2019, **11**, 9955-9963.
- S23 T. T. Beyene, B. A. Jote, Z. T. Wondimkun, B. W. Olbassa, C.-J. Huang, B. Thirumalraj, C.-H. Wang, W.-N. Su, H. Dai and B.-J. Hwang, *ACS Appl. Energy Mater.* 2019, **11**, 31962-31971.
- S24 T. M. Hagos, G. B. Berhe, T. T. Hagos, H. K. Bezabh, L. H. Abrha, T. T. Beyene, C.-J. Huang, Y.-W. Yang, W.-N. Su, H. Dai and B.-J. Hwang, *Electrochim. Acta* 2019, **316**, 52-59.
- S25 N. A. Sahalie, A. A. Assegie, W.-N. Su, Z. T. Wondimkun, B. A. Jote, B. Thirumalraj, C.-J. Huang, Y.-W. Yang and B.-J. Hwang, *J. Power Sources* 2019, **437**, 226912.
- S26 B. A. Jote, T. T. Beyene, N. A. Sahalie, M. A. Weret, B. W. Olbassa, Z. T. Wondimkun, G. B. Berhe, C.-J. Huang, W.-N. Su and B. J. Hwang, *J. Power Sources* 2020, **461**, 228102.
- S27 T. T. Hagos, W.-N. Su, C.-J. Huang, B. Thirumalraj, S.-F. Chiu, L. H. Abrha, T. M. Hagos, H. K. Bezabh, G. B. Berhe, W. A. Tegegne, J.-Y. Cherng, Y.-W. Yang and B.-J. Hwang, *J. Power Sources* 2020, **461**, 228053.
- S28 D. W. Kang, J. Moon, H.-Y. Choi, H.-C. Shin and B. G. Kim, *J. Power Sources* 2021, **490**, 229504.
- S29 L. Dong, Y. Liu, D. Chen, Y. Han, Y. Ji, J. Liu, B. Yuan, Y. Dong, Q. Li, S. Zhou, S. Zhong, Y. Liang, M. Yang, C. Yang and W. He, *Energy Storage Mater.* 2022, **44**, 527-536.
- S30 H. Choi, Y. Bae, S.-M. lee, Y.-C. Ha, H.-C. Shin and B. G. Kim, *J. Electrochem. Sci. Technol.* 2022, **13**, 78-89.
- S31 J. Alvarado, M. A. Schroeder, T. P. Pollard, X. Wang, J. Z. Lee, M. Zhang, T. Wynn, M. Ding, O. Borodin, Y. S. Meng and K. Xu, *Energy Environ. Sci.* 2019, **12**, 780-794.
- S32 S. Fang, Y. Zhang and X. Liu, *Chem. Eng. J.* 2021, **426**, 121880.
- S33 K. Huang, S. Bi, B. Kurt, C. Xu, L. Wu, Z. Li, G. Feng and X. Zhang, *Angew. Chem. Int. Ed.* 2021, **60**, 19232-19240.
- S34 T. M. Hagos, H. K. Bezabh, H. G. Redda, E. A. Moges, W.-H. Huang, C.-J. Huang, W.-N. Su, H. Dai and B. J. Hwang, *J. Power Sources* 2021, **512**, 220388.
- S35 Z. Yu, H. Wang, X. Kong, W. Huang, Y. Tsao, D. G. Mackanic, K. Wang, X. Wang, W. Huang, S. Choudhury, Y. Zheng, C. V. Amanchukwu, S. T. Hung, Y. Ma, E. G. Lomeli, J. Qin, Y. Cui and Z. Bao, *Nat. Energy* 2020, **5**, 526-533.
- S36 T. Pathirana, R. Kerr, M. Forsyth and P. C. Howlett, *Sustain. Energy Fuels* 2021, **5**, 4141-4152.

- S37 A. J. Louli, M. Genovese, R. Weber, S. G. Hames, E. R. Logan and J. R. Dahn, *J. Electrochem. Soc.* 2019, **166**, A1291-A1299.
- S38 R. Weber, M. Genovese, S. Hames, C. Martin, I. G. Hill and J. R. Dahn, *Nat. Energy* 2019, **4**, 683-689.
- S39 M. Genovese, A. J. Louli, R. Weber, C. Martin, T. Taskovic and J. R. Dahn, *J. Electrochem. Soc.* 2019, **166**, A3342-A3347.
- S40 H. Kwon, J.-H. Lee, Y. Roh, J. Baek, D. J. Shin, J. K. Yoon, H. J. Ha, J. Y. Kim and H.-T. Kim, *Nat. Commun.* 2021, **12**, 5537.
- S41 C.-A. Lo, C.-C. Chang, Y.-W. Tsai, S.-K. Jiang, B. J. Hwang, C.-Y. Mou and H.-L. Wu, *ACS Appl. Energy Mater.* 2021, **4**, 5132-5142.

**Table S2.** List of abbreviations used in the manuscripts (excluding commonly used abbreviations. e.g. nm,  $\mu\text{m}$ , etc.)

| Abbreviations       | Full name                                       |
|---------------------|-------------------------------------------------|
| AFLIBs              | Anode-free Li-ion batteries                     |
| CC                  | Carbon cloth                                    |
| CP                  | Carbon paper                                    |
| CF                  | Carbon foil                                     |
| C/D                 | Charge/discharge                                |
| ED                  | Energy density                                  |
| LIBs                | Li-ion batteries                                |
| LMBs                | Li-metal batteries                              |
| SEI                 | Solid-electrolyte-interface                     |
| P/S                 | Plating/stripping                               |
| wt%                 | Weight percentage                               |
| LiPF <sub>6</sub>   | Lithium hexafluorophosphate                     |
| EC/DMC              | Ethylene carbonate/dimethyl carbonate           |
| TEMPO               | 2,2,6,6-tetramethylpiperidine-1-oxyl            |
| LFP                 | LiFePO <sub>4</sub>                             |
| FESEM               | Field emission scanning electron microscopy     |
| EDX                 | Energy dispersive X-ray spectroscopy            |
| AFM                 | Atomic force microscopy                         |
| FETEM               | Field-emission transmission electron microscopy |
| SEI/CC <sup>O</sup> | SEI formed CC in the oxidized state             |
| SEI/CC <sup>R</sup> | SEI formed CC in the reduced state              |
| XRD                 | X-ray diffraction                               |
| XPS                 | X-ray photoelectron spectroscopy                |
| EIS                 | Electrochemical impedance spectra               |
| OCV                 | Open circuit voltage                            |
| CVs                 | Cyclic voltammograms                            |
| RMS                 | Root mean square                                |
| CE                  | Coulombic efficiency                            |
| LED                 | Light Emitting diodes                           |

### Comparison of carbon substrates used for this study

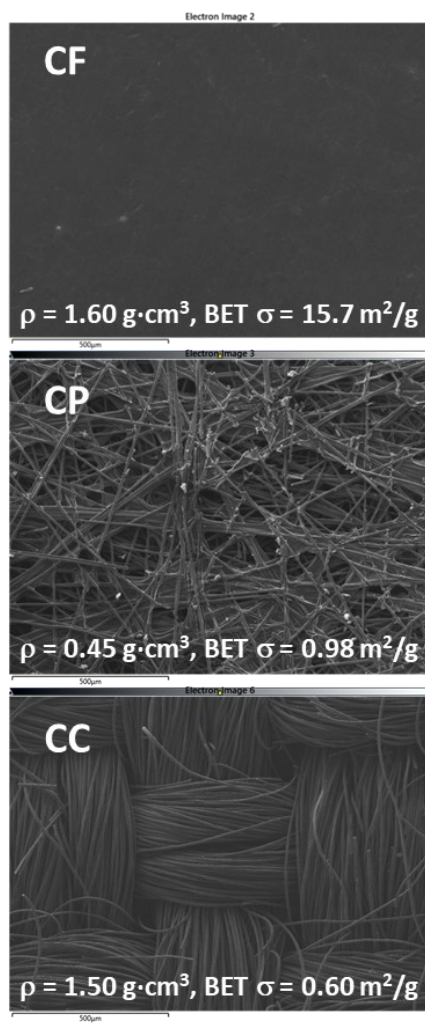

CF is a compressed graphite sheet with a thickness of 220  $\mu\text{m}$ , obtained from Samjungcng, Korea (samjungcng.co.kr). It is made by homogeneously compressing the natural graphite flakes.

CP with a thickness of 190  $\mu\text{m}$  (Toray TGP-H-120) was purchased from FuelCellsEtc. CP is made of irregularly interwoven carbon fibers (polyacrylonitrile-based), which are firmly connected by carbon films.

Plain CC with a thickness of 356  $\mu\text{m}$  (1071) was purchased from FuelCellsEtc. CC1071 has an interwoven structure, and usual paper production techniques are used for manufacture.

Prior to use, all electrodes were cleaned by brief flame-burning (ca. 10 s).

**Fig. S1** FESEM images for CF, CP, and CC. Density ( $\rho$ ) is from the manufacturers and BET  $\sigma$  (Brunauer, Emmett, and Teller surface area) was calculated from  $\text{N}_2$  adsorption (Belsorp-max, MicrotracBEL, Corp.).

FESEM images show that, while CF has no characteristic surface features, CC has an aligned carbon fibers (10  $\mu\text{m}$  in diameter). CP is composed of randomly oriented carbon fibers (ca. 10  $\mu\text{m}$  in diameter) integrated with graphitic binders.



### Determination of electrochemically active surface areas of CF, CP, and CC

Electrochemically active areas were determined from cyclic voltammograms of TEMPO (2,2,6,6-tetramethylpiperidine-1-oxyl, 20 mM) in 1.0 M LiPF<sub>6</sub>/EC:DMC. **Fig. S2** shows quasi-reversible voltammograms of TEMPO at 0.5 mV·s<sup>-1</sup>. The Randles-Sevcik equation was applied to calculate the electrode area. The anodic peak current and the diffusion coefficient of 9.2 x 10<sup>-6</sup> cm<sup>2</sup>·s<sup>-1</sup> (*Energy Adv.* 2022, **1**, 21.) were adopted. The smallest area of 1.04 cm<sup>2</sup> was obtained for CC, relative to 1.69 and 1.50 cm<sup>2</sup> for CF and CP, respectively, in CR2032 coin-type cells.

Note that, though CC has a cylindrical shape, the Randles-Sevcik equation, which is based on the linear diffusion, can be applied for the determination of an electrode area. The radial diffusion becomes important either when the length of cylinder is short compared to the radius (*Phys. Chem. Chem. Phys.* 2018, **20**, 148.) or when the scan rate is slow (*J. Electroanal. Chem.* 2020, **859**, 113865.), both of which are not the case in this study.

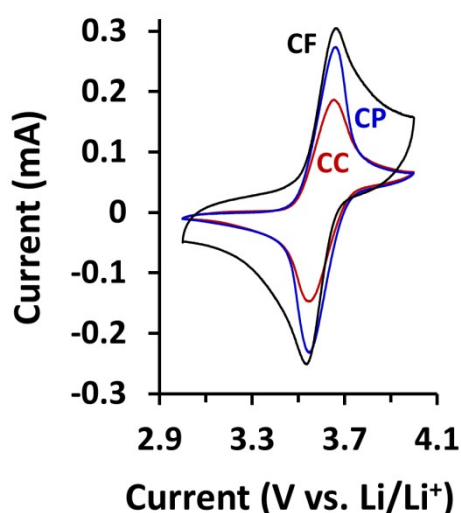

**Fig. S2** Cyclic voltammograms of TEMPO on CF, CP, and CC in coin-type cells. The electrochemically active areas of 1.69, 1.50, and 1.04 cm<sup>2</sup> for CF, CP, and CC, respectively, were obtained.

**Marginal changes in SEI compositions on CC**

In contrast to a gradual increase in oxygen and fluorine contents of SEI on CF and CP, the SEI compositions on CC are almost invariant with cycling (0.02 - 3.0 V, 20 mA·g<sup>-1</sup>) once formed during the 1<sup>st</sup> cathodic scan (<sup>1</sup>R). For example, the fluorine and oxygen contents slightly increase after the 1<sup>st</sup> anodic scan (from <sup>1</sup>R to <sup>1</sup>O), but the change is negligible considering an error range in EDX. The compositional variation is also marginal after 5 and 10 cycles irrespective of the redox states, which signifies the irreversible formation of the robust SEI on the CC after the 1<sup>st</sup> cathodic scan (<sup>1</sup>R).

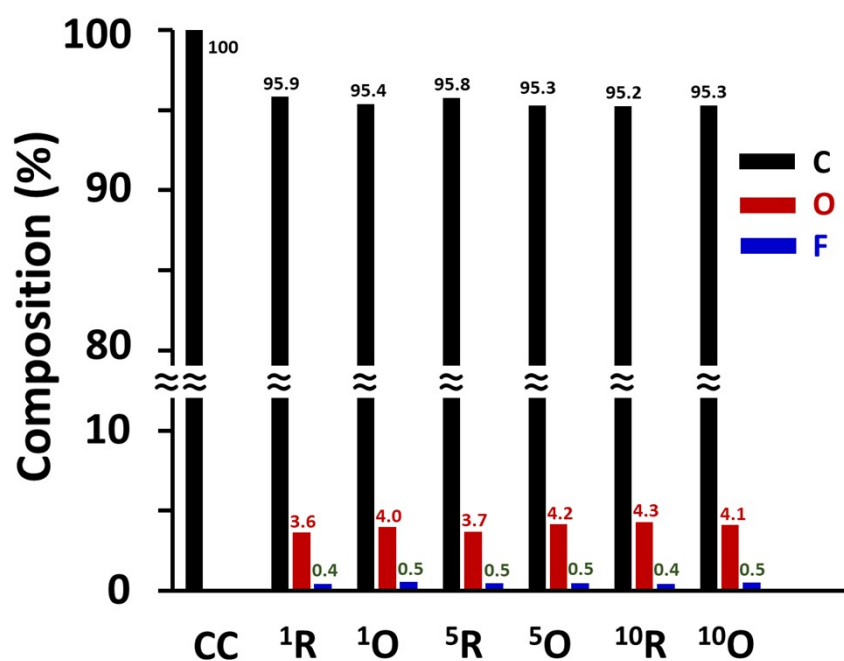

**Fig. S3** Variation of elemental compositions examined using EDX. Superscript numerals on the abscissa indicate the number of galvanostatic cycles in a cell of CC || Li, and R and O denote the reduced state at 0.02 V and the oxidized state at 3.0 V, respectively.

**EDX spectra of SEI-formed CF and CP with cycles**

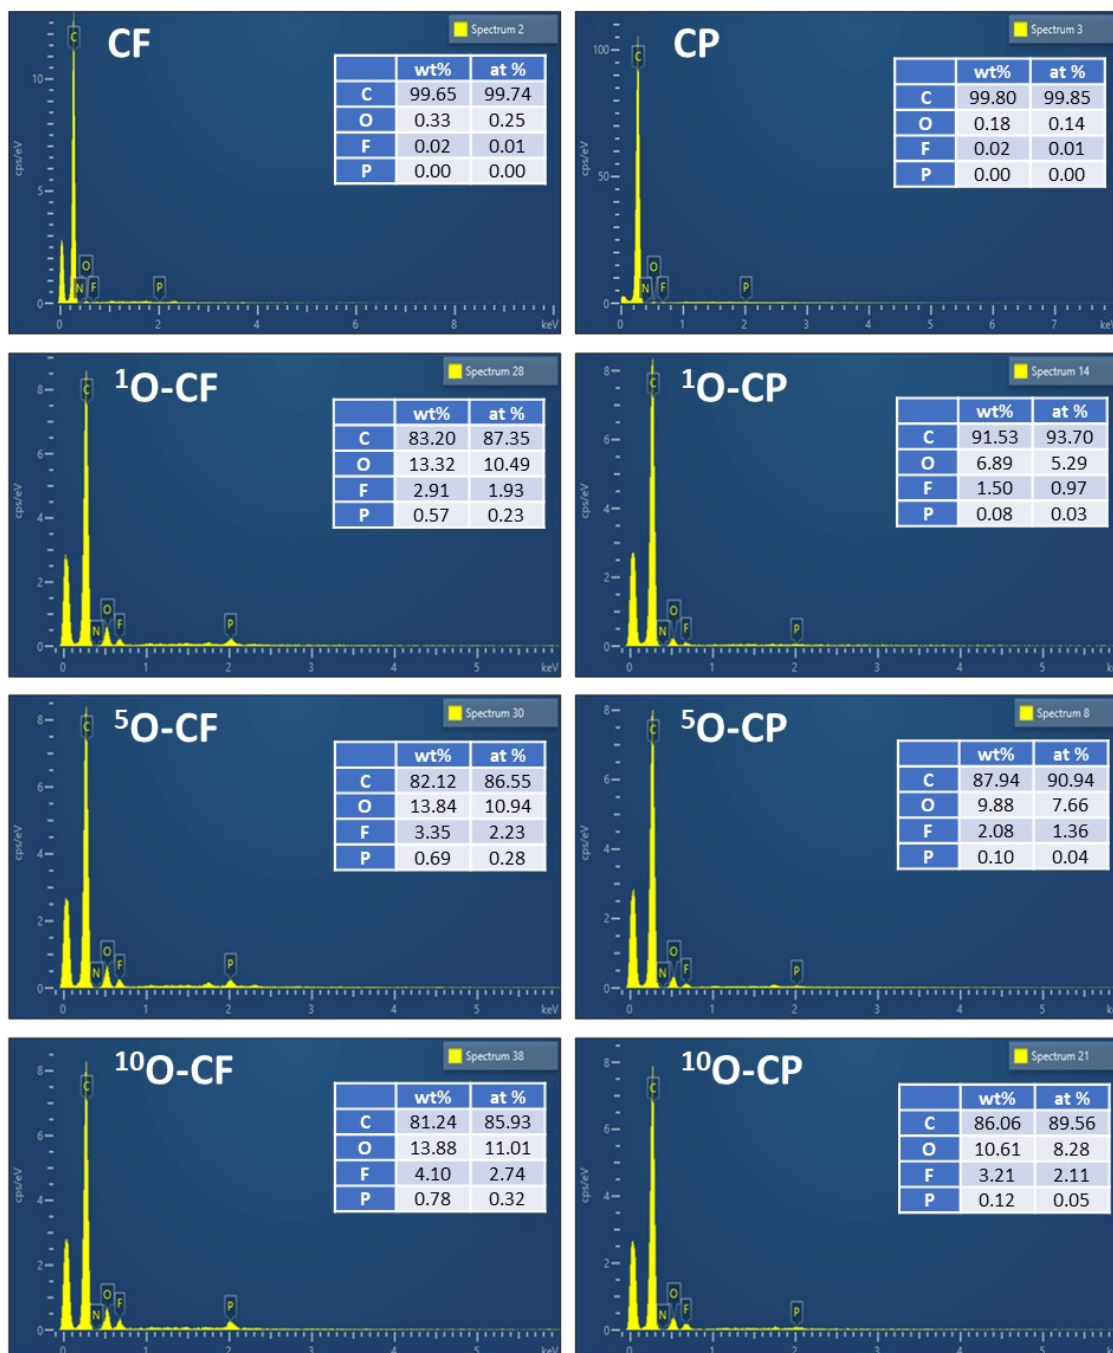

**Fig. S4** EDX spectra of CF and CP electrodes subjected to galvanostatic cycles in coin-type cells between 0.02 and 3.0 V. Superscript numerals indicate the number of cycles, and O denotes the oxidized state at 3.0 V.

**EDX spectra of SEI/CC<sup>R</sup> and SEI/CC<sup>O</sup> with cycles**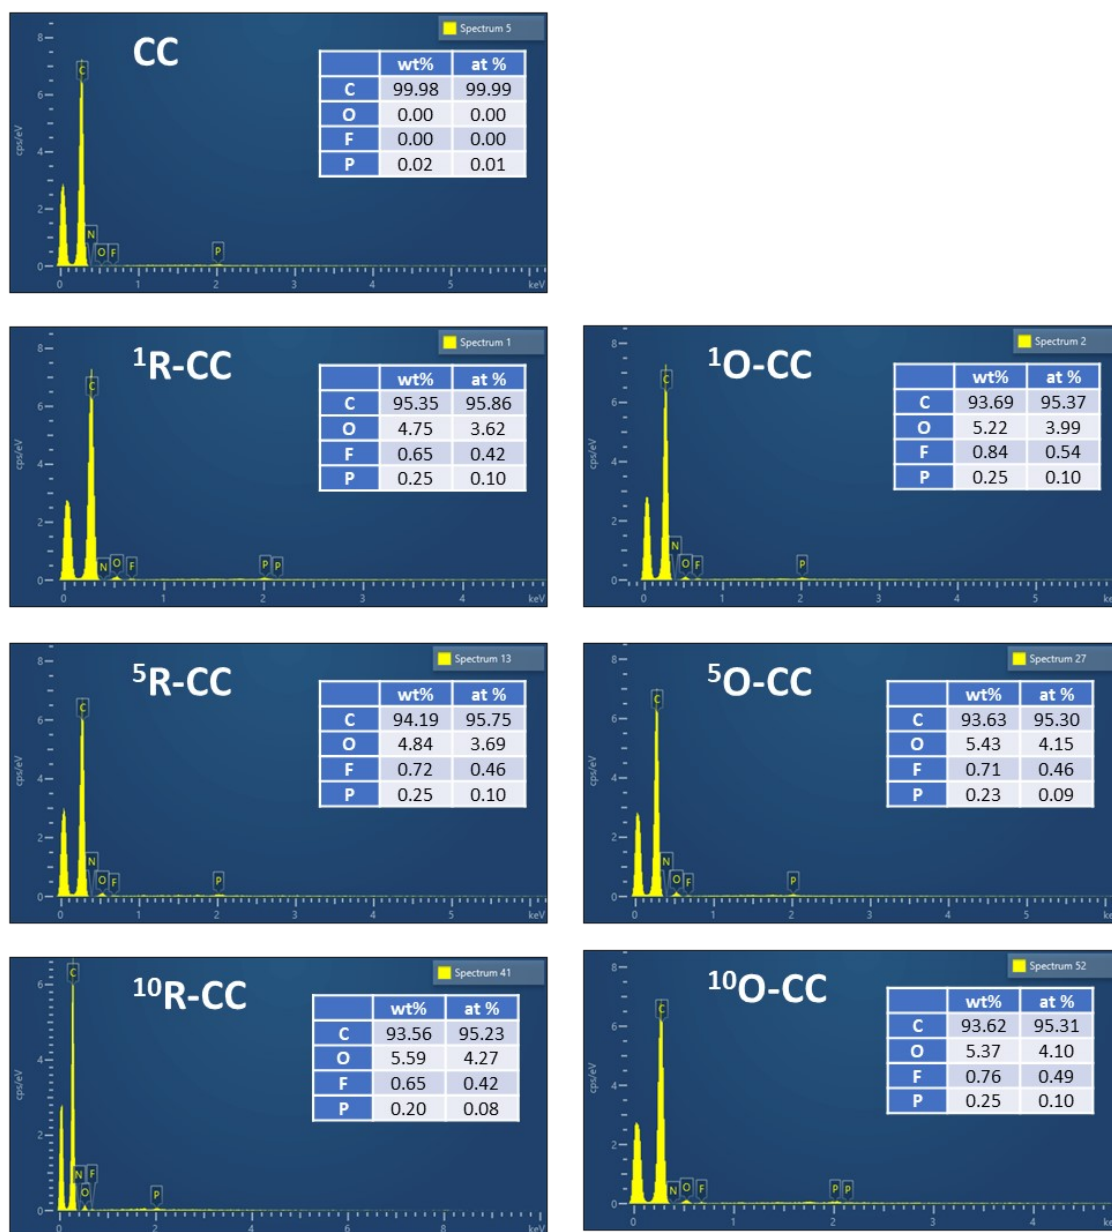

**Fig. S5** EDX spectra of CC electrodes subjected to galvanostatic cycles in coin-type cells between 0.02 and 3.0 V. Superscript numerals indicate the number of cycles, and R and O denote the reduced state at 0.02 V and the oxidized state at 3.0 V, respectively.

**FETEM image also supports that SEI is immediately formed on CC**

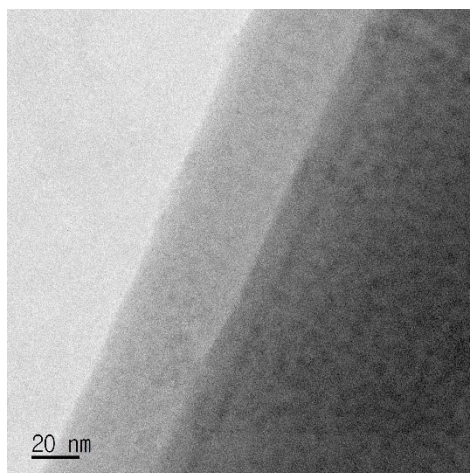

**Fig. S6** FETEM image of SEI/CC<sup>R</sup> after a single scan to 0.02 V. The thickness and uniformity of SEI are identical to that in Figure 2B, indicating that the SEI formation on CC is complete after a single cathodic scan to 0.02 V.

**FESEM image of stripped CC reveals the perfect reversibility for Li P/S**

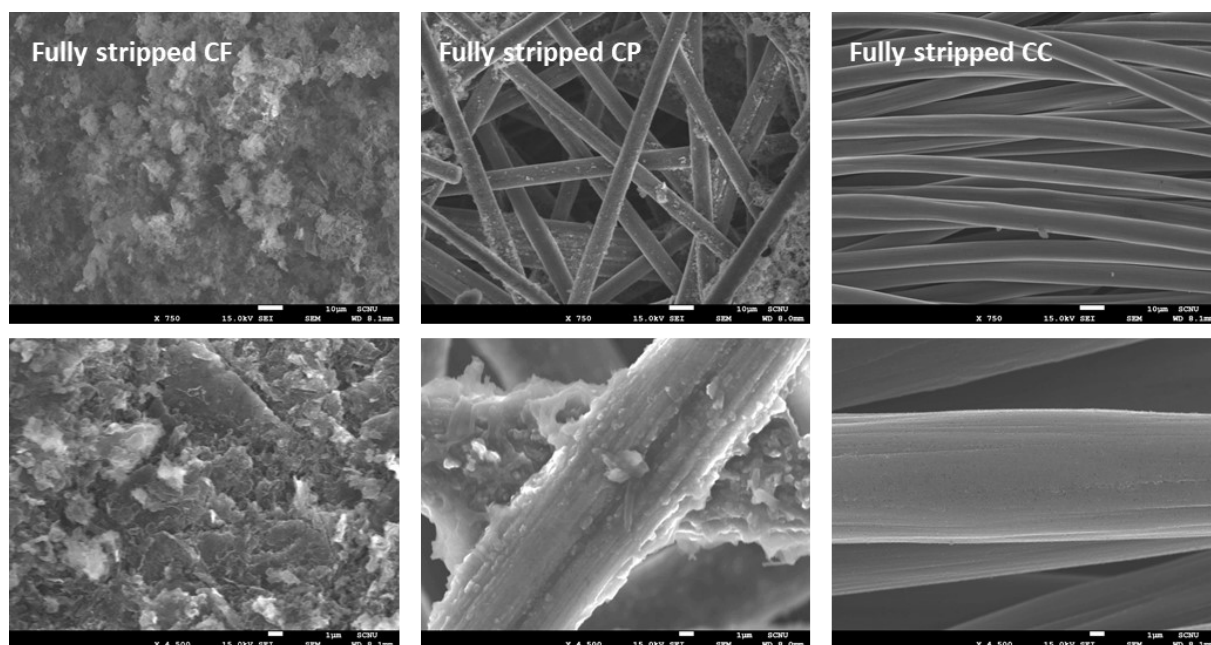

**Fig. S7** FESEM images of fully stripped CF, CP, and CC. In contrast to CF and CP, CC shows no Li remaining, indicating the perfect reversibility for Li P/S processes.

**Negligible Li<sup>+</sup> intercalation at voltages lower than 0.02 V**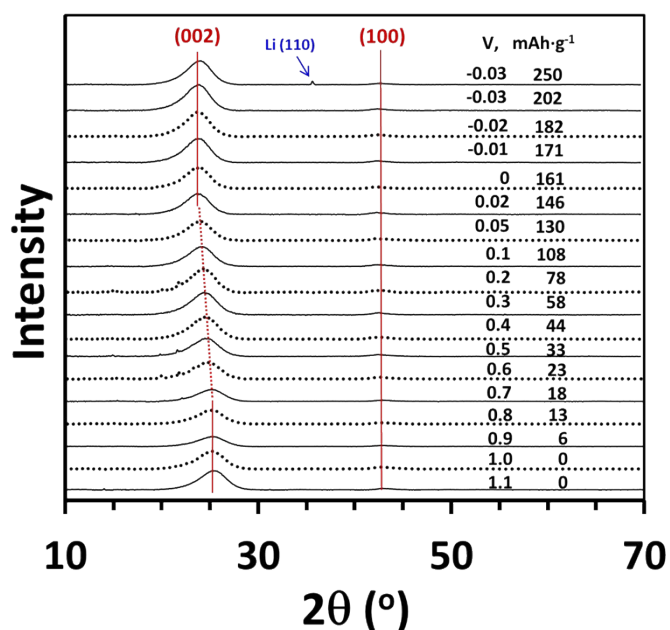

**Fig. S8** Evolution of XRD patterns of CC during a scan toward the negative voltages. It is obvious that the  $d_{002}$  peaks move toward lower  $2\theta$  angles with Li<sup>+</sup> intercalation, but become stationary from the voltage lower than 0.02 V, which implies that no more Li<sup>+</sup> ions are intercalated into SEI/CC<sup>R</sup>.

**XPS reveals continuous increase of oxygen functionalities with ozone irradiation**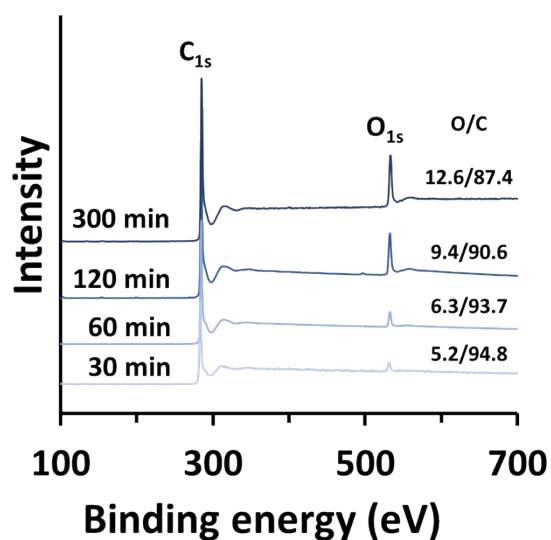

**Fig. S9** Survey XPS spectra of CC after ozone irradiation to introduce oxygen functional groups to the CC surface.



**SEI/CC<sup>R</sup> can be handled in dry air for ca. 1 h with no serious degradation**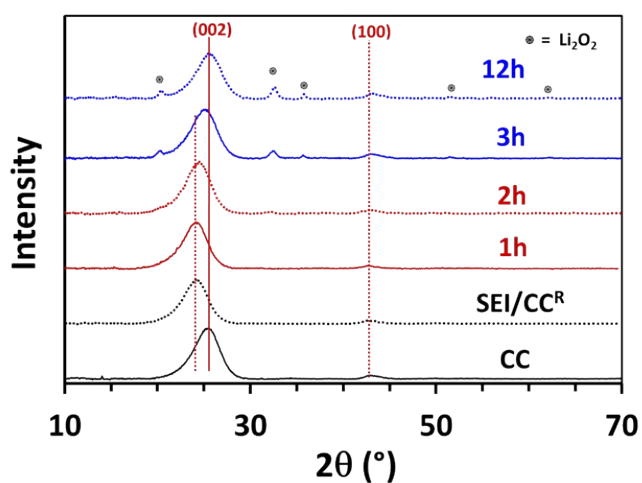

**Fig. S10** Change of XRD patterns of SEI/CC<sup>R</sup> when stored in the dry-room condition (air, dew point = -40 °C) during 1, 2, 3, and 12 h. From 2h-exposure, the  $d_{002}$  peak begins to shift to the positive  $2\theta$  direction along with the appearance of Li<sub>2</sub>O<sub>2</sub>.

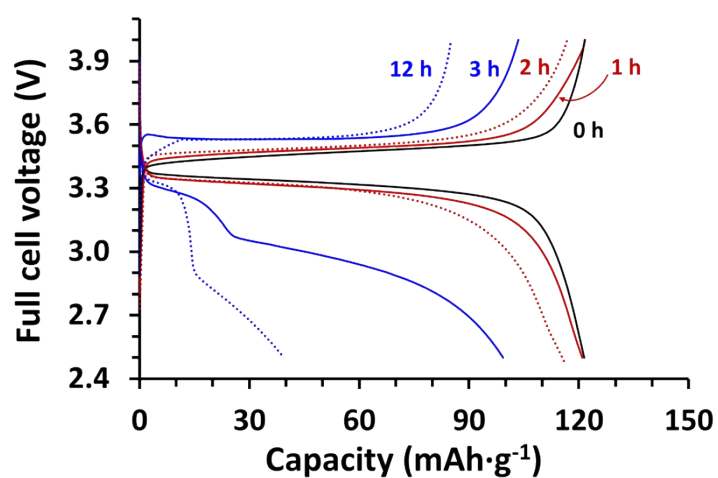

**Fig. S11** C/D profiles of AFLIBs consisting of SEI/CC<sup>R</sup> exposed to dry air and LFP at 1.0 C.
